# Supplementary material
Source: PubMed Central journal article supplement (PMC5686580)
Supplement: MCB.00441-17_zmb023171653s1.pdf [file MCB.00441-17_zmb023171653s1.pdf]

A

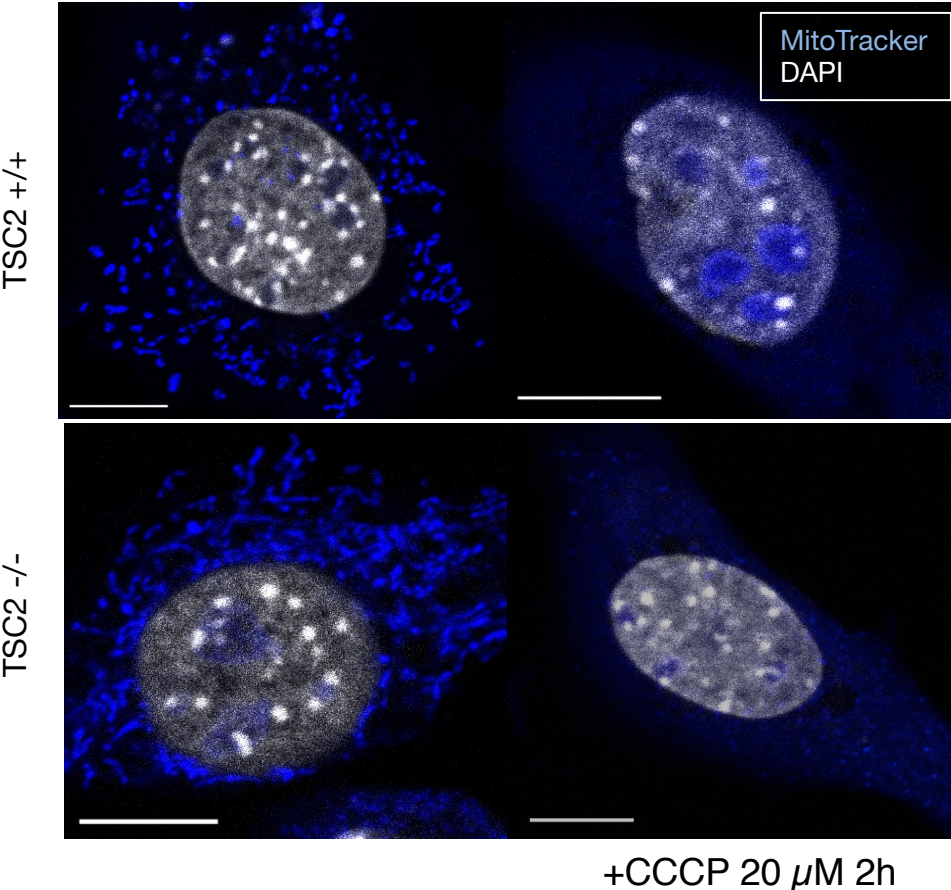

Supplemental Fig1

A) Loss of MitoTracker uptake after CCCP treatment reflects loss of mitochondrial membrane potential in both TSC2 -/- and control cells. Representative confocal microscope images from cells treated for 2h with 20  $\mu$ M CCCP. Other times and doses display showed similar results, not shown. 10  $\mu$ m bar

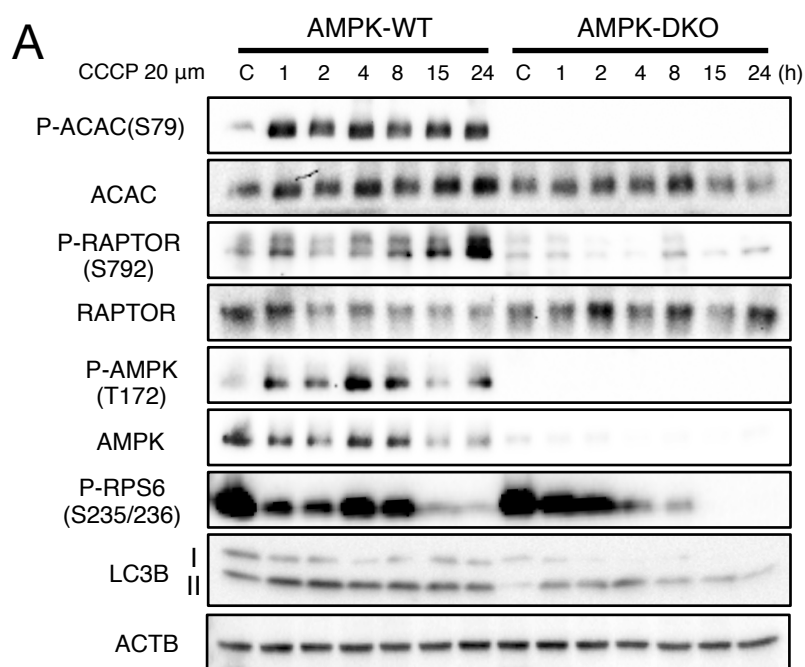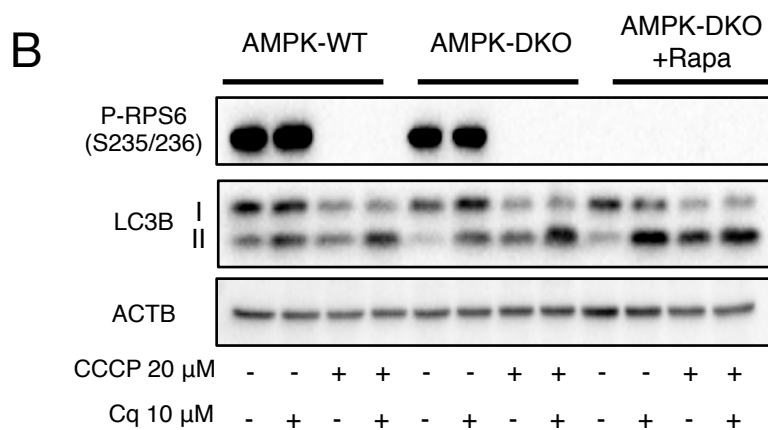

Supplementary Figure 2. CCCP-mediated mTORC1 downregulation and autophagy stimulation is AMPK independent. (A) AMPK-WT and AMPK-DKO cells were stimulated with CCCP for the indicated times. (B) Cells were stimulated with CCCP for 15h in the presence or absence of chloroquine (CQ) and/or rapamycin 20 nM (Rapa). Representative blots are shown.

**Figure S3**

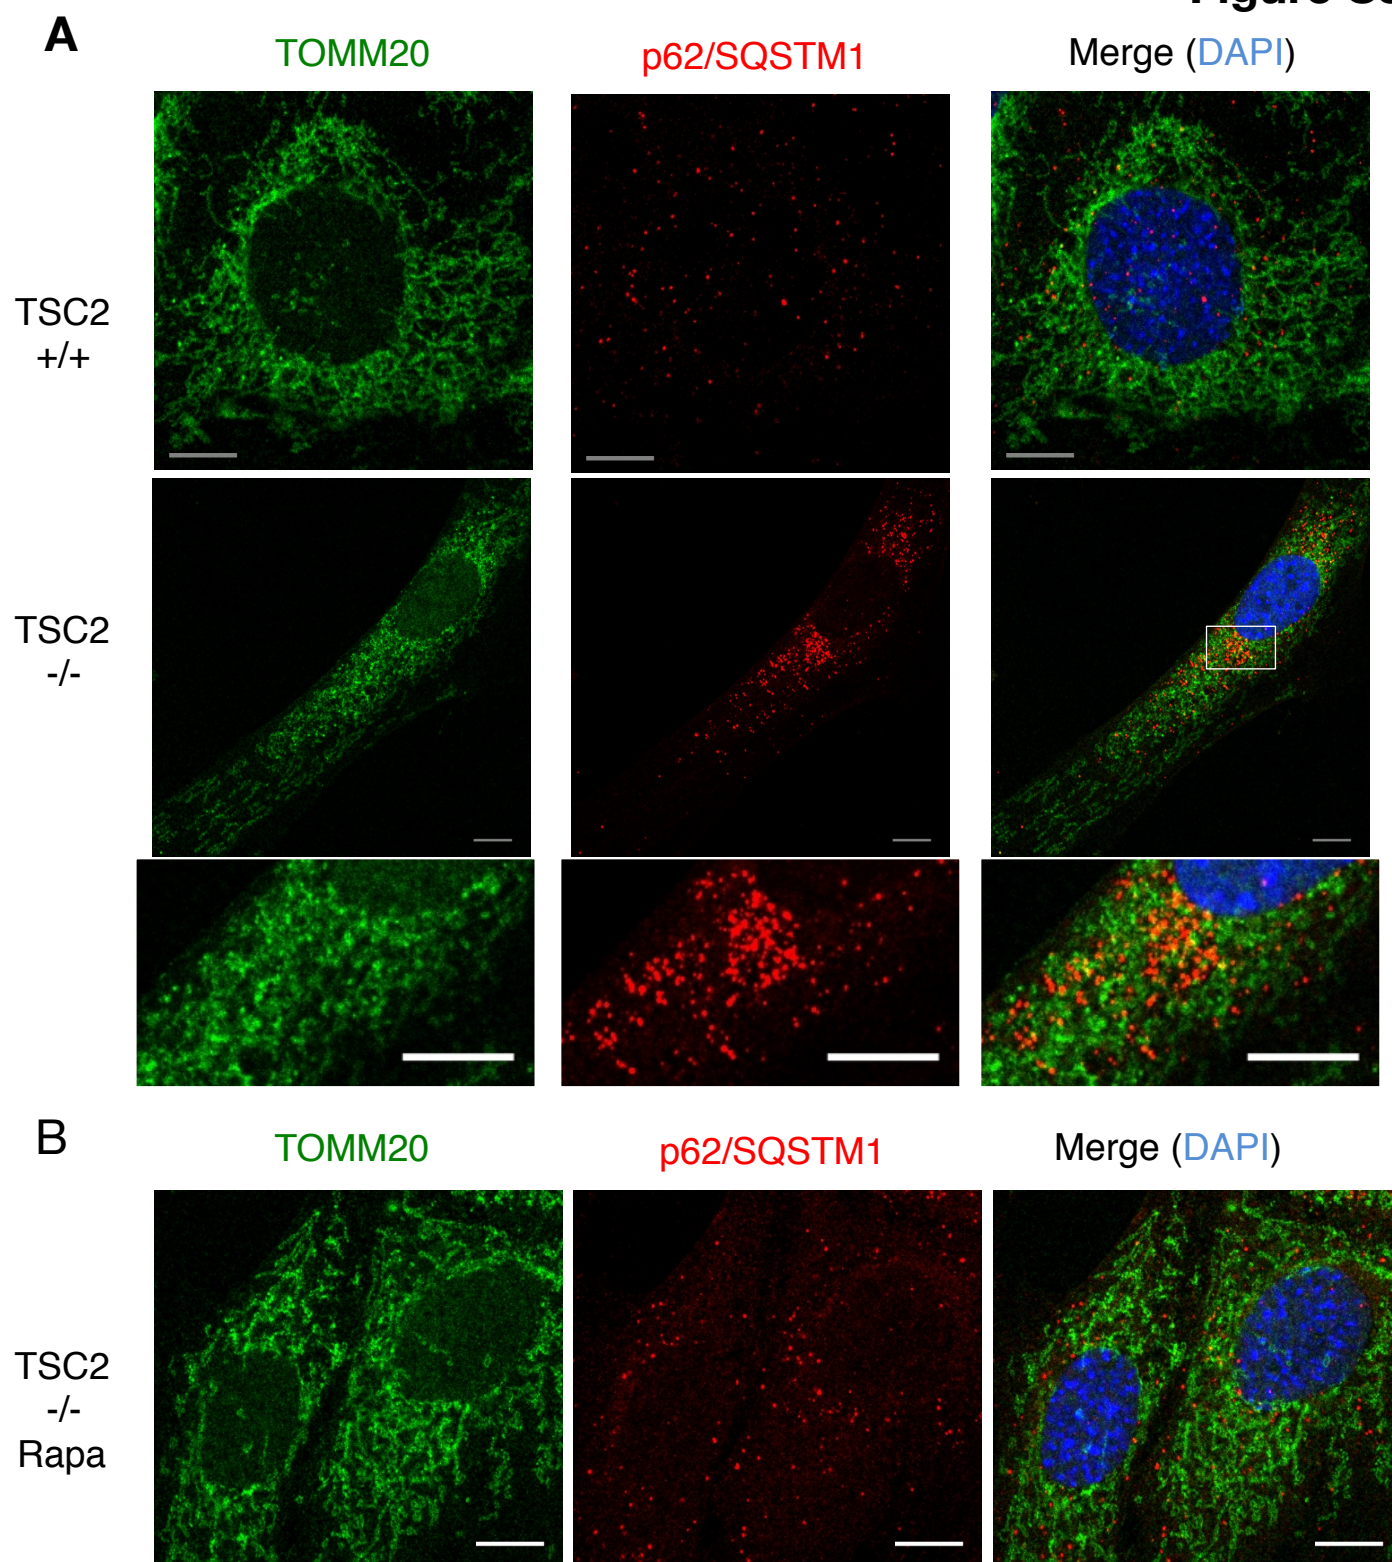

Supplemental Fig3. p62/SQSTM1 positive mitochondria in TSC2 -/- cells. (A) Representative confocal microscopy images of TSC2 +/+ and TSC2 -/- MEFs. (B) TSC2 -/- were treated with 20 nM rapamycin for 15h.



Figure S4

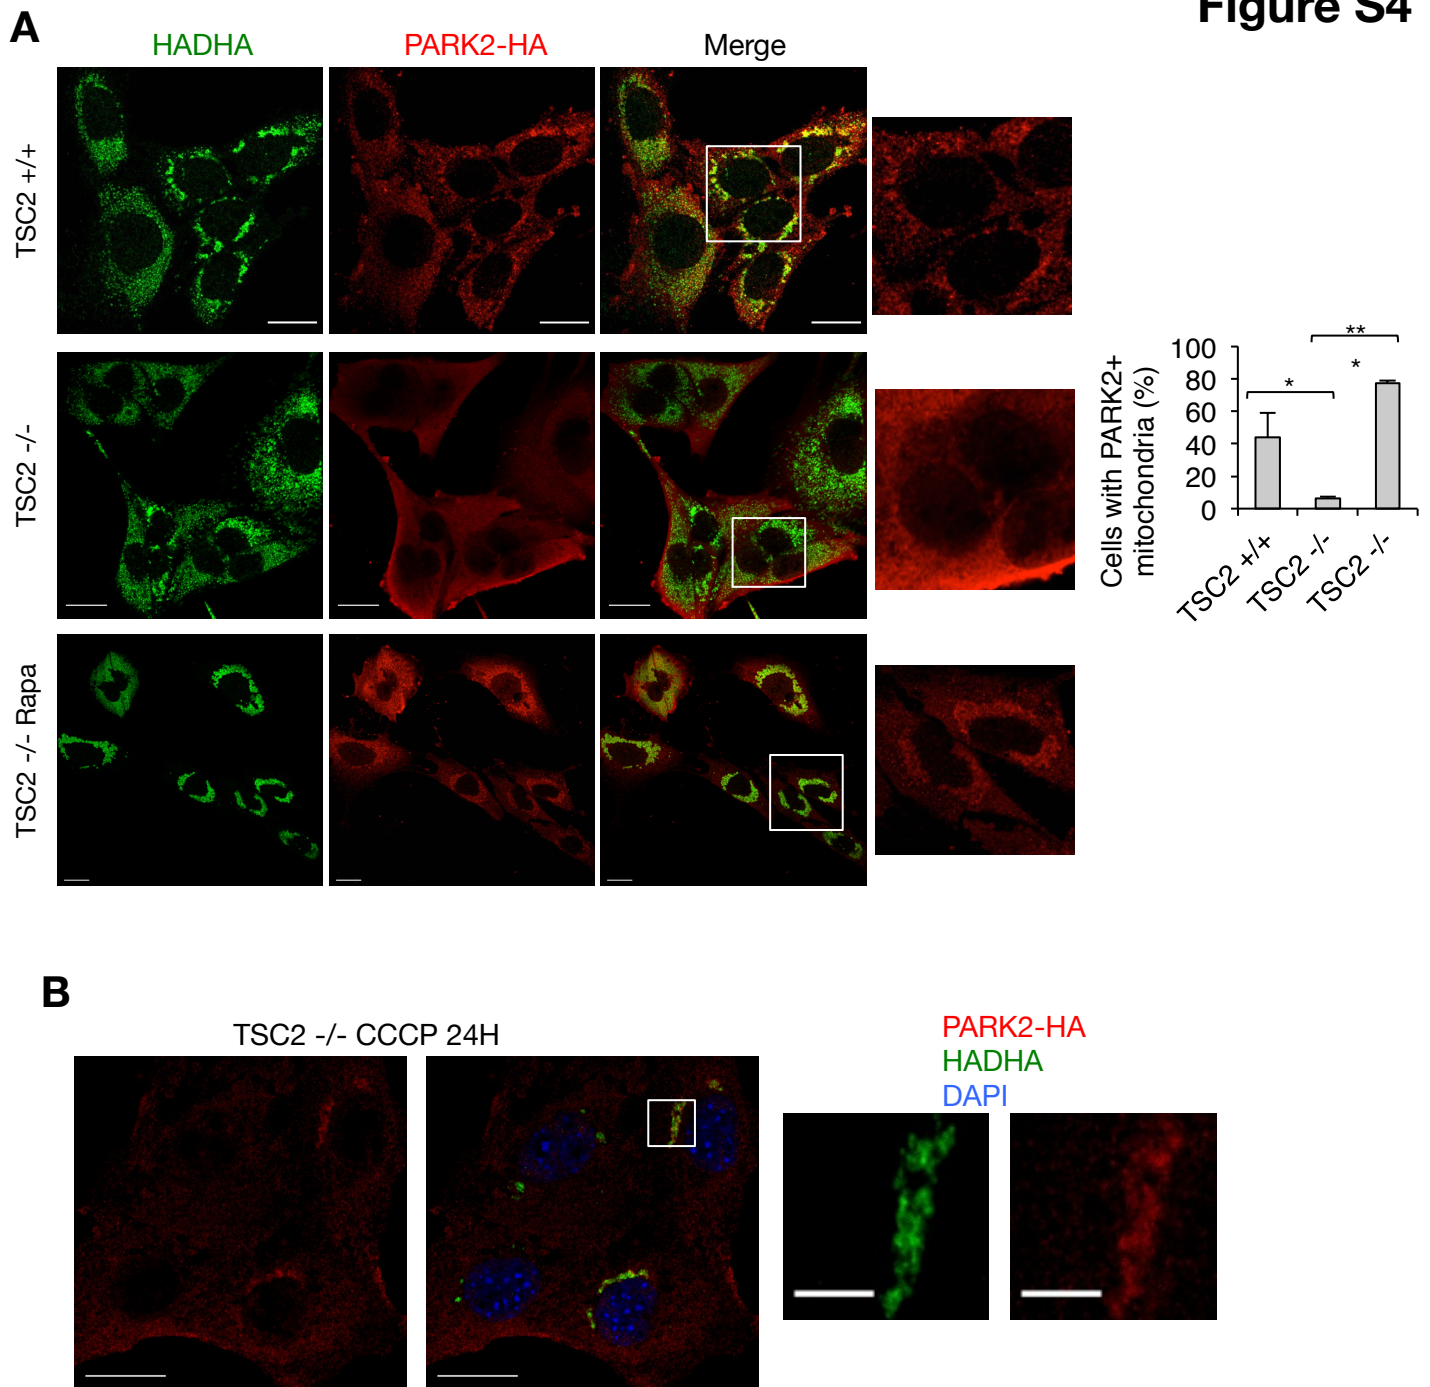

**B**

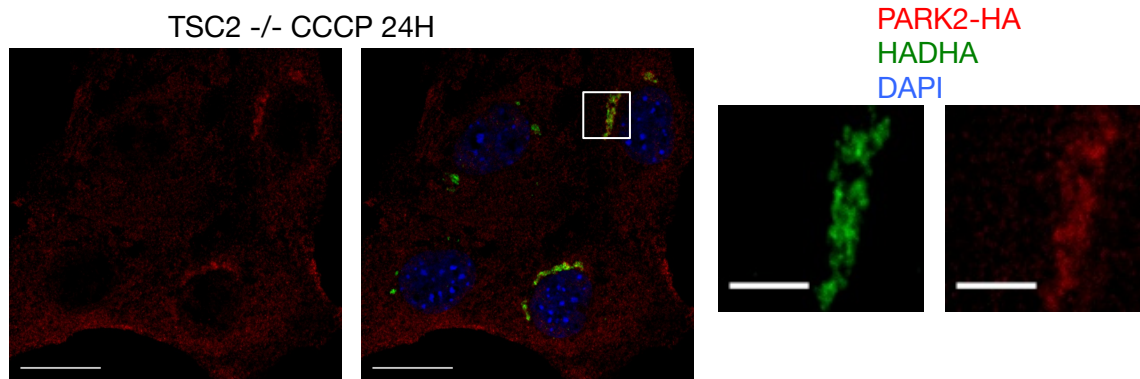

Supplemental Fig4.

A) Impaired PARK2 translocation to mitochondria in valinomycin-treated TSC -/- cells. Cells were treated with valinomycin 1  $\mu$ M for 3h. Quantification shows percentage of PARK2+ mitochondria, of 3 independent experiments. \*P < 0.05, \*\*\*P < 0.001

B) PARK2 translocation to mitochondria in TSC2 -/- cells after prolonged CCCP treatment (20  $\mu$ M CCCP, 24h). By the time that most mitochondria are cleared in control cells, mitochondrial PARK2 is still observed in TSC2 -/- cells. Bars represent 20  $\mu$ M, or 5  $\mu$ M in enlarged images

**Table S1.** List of antibodies

| Antibody  | Company           | Ref        | WB dilution | IF dilution |
|-----------|-------------------|------------|-------------|-------------|
| ACAC      | Cell Signaling    | #3662      | 1:1000      |             |
| P-ACAC    | Cell Signaling    | #3661      | 1:1000      |             |
| AMPK      | Cell Signaling    | #2352      | 1:1000      |             |
| P-AMPK    | Cell Signaling    | #2531      | 1:1000      |             |
| FOXO1     | Cell Signaling    | #2880      |             | 1:100       |
| LC3B      | Cell Signaling    | #4108      | 1:1000      |             |
| RAPTOR    | Cell Signaling    | #4978      | 1:1000      |             |
| P-RAPTOR  | Cell Signaling    | #2083      | 1:1000      |             |
| RPS6      | Cell Signaling    | #2217      | 1:5000      |             |
| P-RPS6KB1 | Cell Signaling    | #9205      | 1:1000      |             |
| RPS6KB1   | Cell Signaling    | #9202      | 1:1000      |             |
| TSC2      | Cell Signaling    | #3612      | 1:1000      |             |
| TUBA1A    | Cell Signaling    | #2144      | 1:5000      |             |
| HADHA     | Abcam             | #ab54477   | 1:1000      | 1:200       |
| TOMM20    | Santa Cruz        | #sc-11415  |             | 1:200       |
| GFP       | Santa Cruz        | #sc-9996   | 1:1000      |             |
| SQSTM1    | Progen            | #GP62      | 1:2500      | 1:500       |
| PINK1     | Novus Biologicals | #BC100-494 | 1:1000      |             |
| P-RPS6    | Thermo-Fisher     | #MA5-15140 | 1:2500      |             |
| V5        | Thermo-Fisher     | #R960-25   | 1:2500      |             |
| HA        | Roche             | #12CA5     |             | 1:200       |
| ACTB      | Sigma             | #A5316     | 1:5000      |             |

**Table S2.** List of oligonucleotides

| <b>Gene</b>           | <b>Forward</b>           | <b>Reverse</b>          |
|-----------------------|--------------------------|-------------------------|
| <i>Ppargc1a</i>       | AATCAGACCTGACACAACGC     | GCATTCCTCAATTCACCAA     |
| <i>Ppargc1b</i>       | CGCTCCAGGAGACTGAATCCAG   | CTTGACTACTGTCTGTGAGGC   |
| <i>Actb</i>           | GACATGGAGAAGATCTGGCA     | GGTCTCAAACATGATCTGGGT   |
| <i>Fis1</i>           | TGGTGTCTGTGGAGGATCTG     | ATTGCGTGCTCTTGGACAC     |
| <i>Mfn1</i>           | ATGGCAGAAACGGTATCTCCA    | CTCGGATGCTATTCGATCAAGTT |
| <i>Mfn2</i>           | CGAGGCTCTGGATTCACTTC     | CAACCAGCCAGCTTTATTCC    |
| <i>Opa1</i>           | ACCAGGAGAAGTAGACTGTGTCAA | TCTTCAAATAAACGCAGAGGTG  |
| <i>Drp1</i>           | GCTAGTCCACGTTTCACCAGA    | TCCATGTGGCAGGGTCAT      |
| <i>Pink1</i>          | CTGAGATGCCTGAGTCGGTG     | GTGCAGACGGTCTCTTGCT     |
|                       |                          |                         |
| <i>Mycoplasma sp.</i> | GGCGAATGGGTGAGTAACACG    | CGGATAACGCTTGCGACCTATG  |
